# Supplementary material for: Five vs. six membered-ring PAH products from reaction of o -methylphenyl radical and two C 3 H 4 isomers
Source: Royal Society of Chemistry journal article supplement (doi:10.1039/d1cp01764k), 2021-01-01
Supplement: d1cp01764k1.pdf [file d1cp01764k1.pdf]

# Supplementary information for:

## Five vs Six Membered-Ring PAH Products from Reaction of *o*-Methylphenyl Radical and two C<sub>3</sub>H<sub>4</sub> Isomers

### 1. Supplementary Photoionisation Spectra and AIE Values

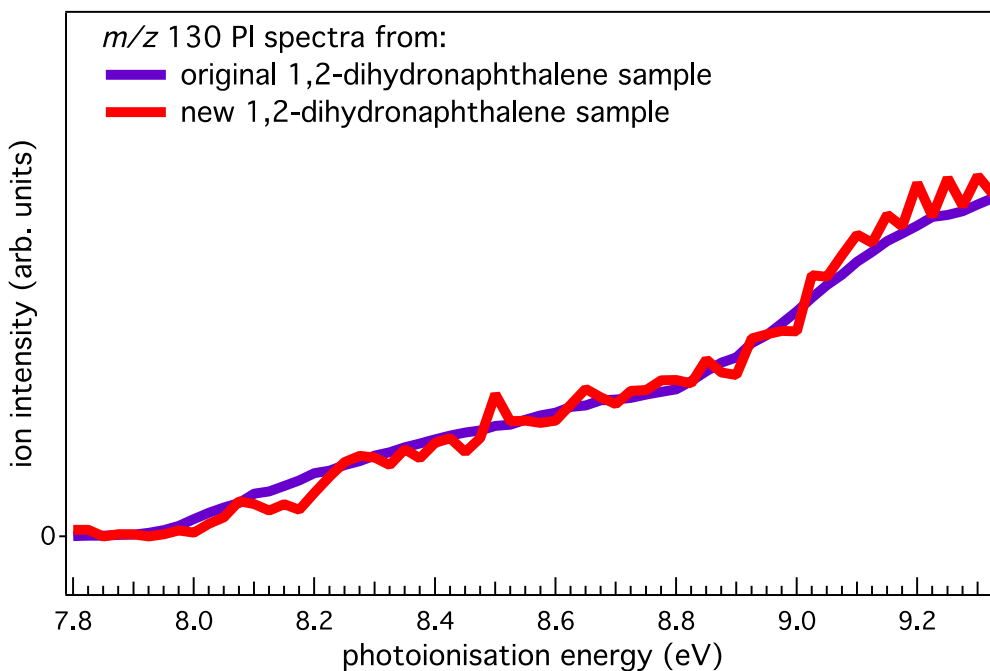

Figure S1. Average PI spectra of  $m/z$  130 from original 1,2-dihydronaphthalene sample (solid purple line, included in Figure 3) and PI spectrum from a new sample of 1,2-dihydronaphthalene acquired on the same instrument (solid red line).

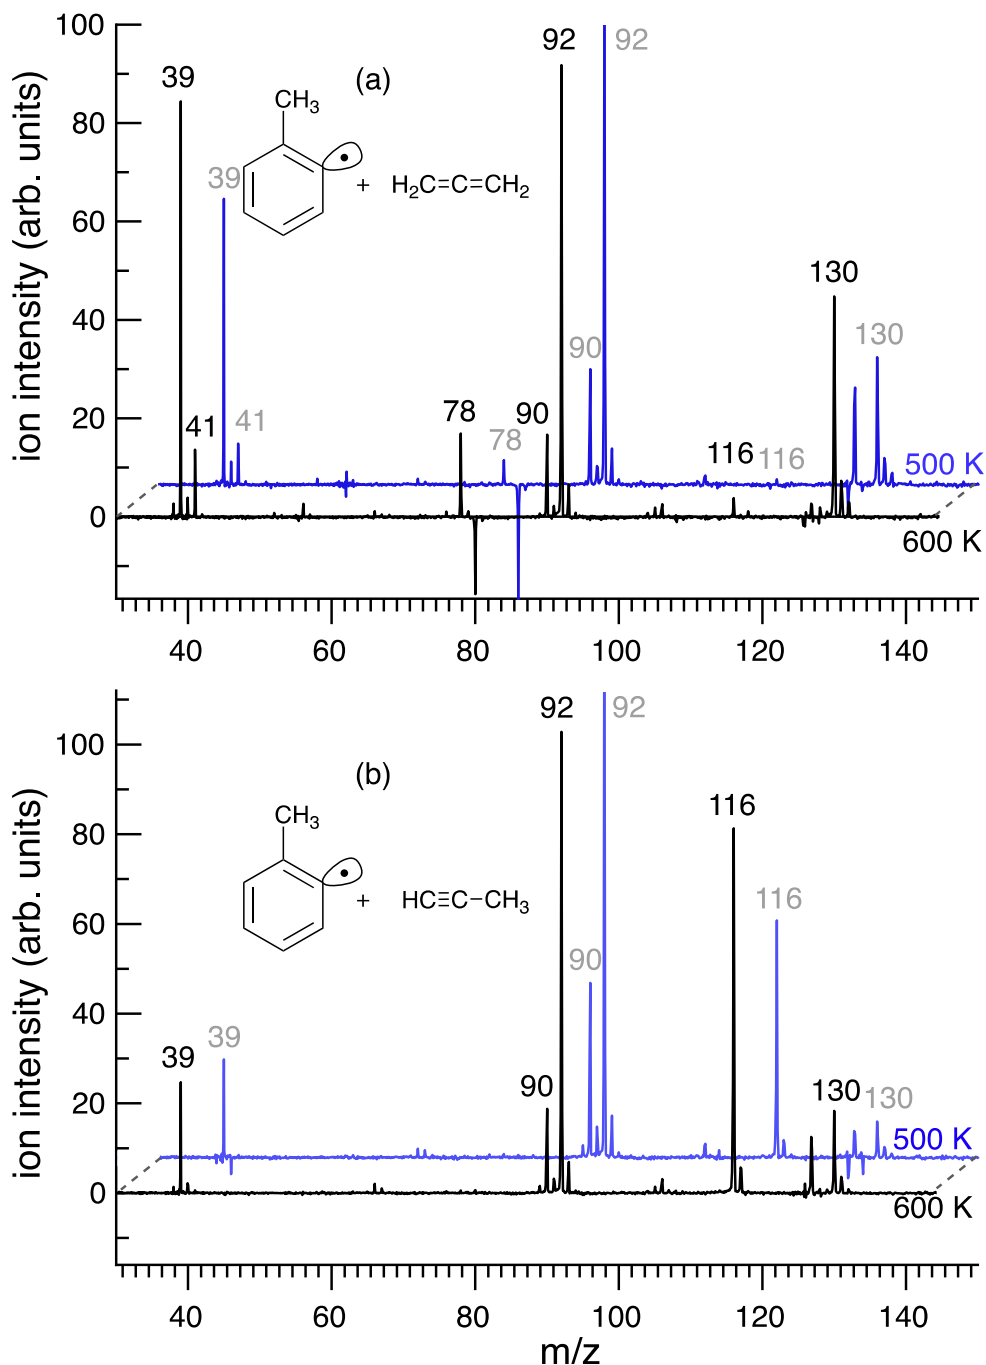

Figure S2. Product mass spectra integrated over 0–50 ms after photolysis of *o*-iodotoluene in the presence of (a) allene and (b) propyne at 600 K (black) and 500 K (blue) and 4 Torr. All spectra are normalised to the base peak. For both reactions the normalised ion intensity of product peaks is reduced at lower 500 K. Additionally, the reduction in signal of  $m/z$  39 for the allene case at 500 K supports the idea that this signal originates from the increased allene absorption cross section at elevated temperatures.

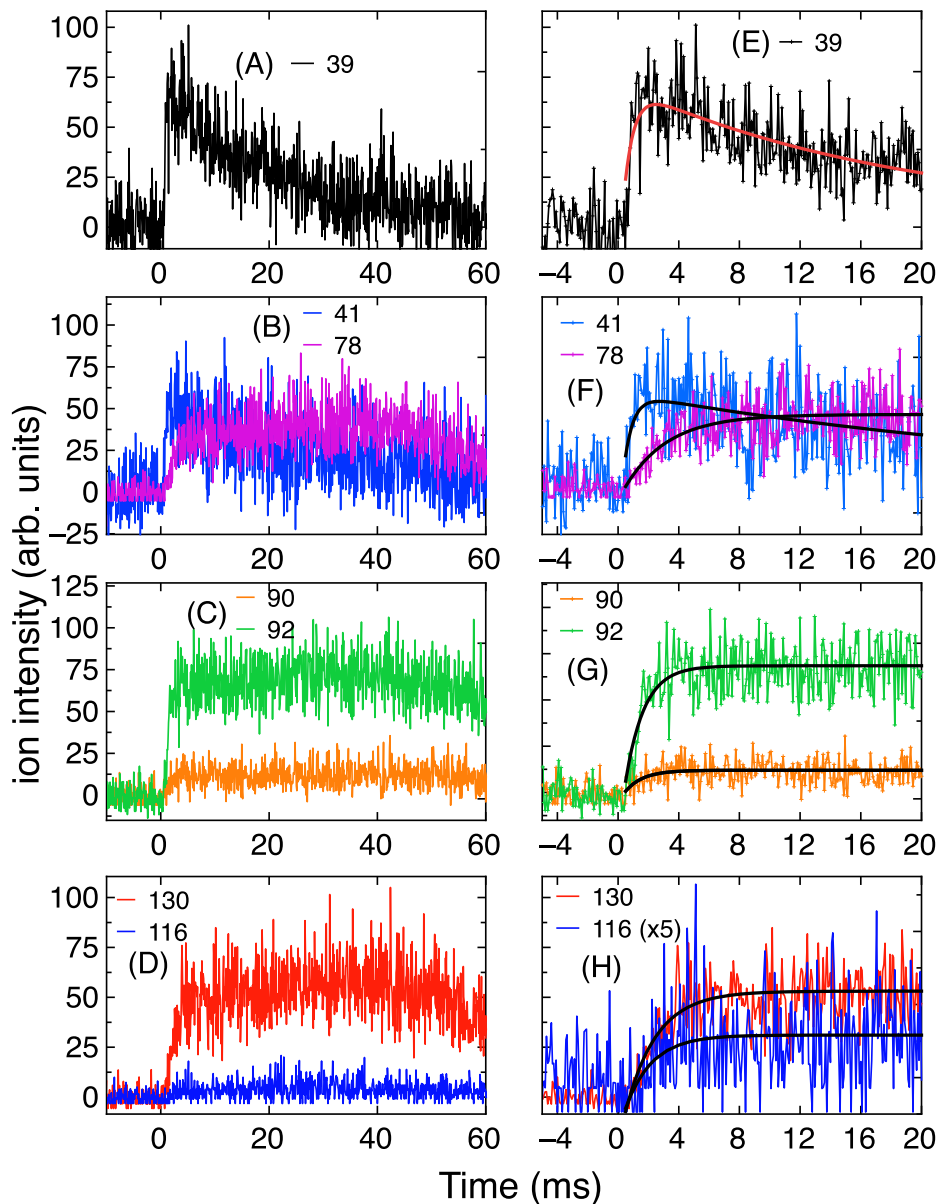

Figure S3. Kinetic traces of (A)  $m/z$  39, (B) 41 and 78, (C)  $m/z$  90 and 92, and (D)  $m/z$  130 and 116 from *o*-CH<sub>3</sub>C<sub>6</sub>H<sub>4</sub> + allene at 600K. For each channel, a second plot showing the profile between -5 and 20 ms is also provided (E and F). The time constants for each of these profiles is summarized in Table S1. (A)  $m/z$  39 follows a laser dependent trace (fast reaction time) and thus is not related to the targeted *o*-CH<sub>3</sub>C<sub>6</sub>H<sub>4</sub> + C<sub>3</sub>H<sub>4</sub> reaction. Additionally, the  $m/z$  39 rate of decay matches the growth of  $m/z$  78 suggesting this peak originates from the reaction of two  $m/z$  39 molecules. The growth of  $m/z$  41 is on a slower time scale than the growth of  $m/z$  39 but is still faster than the growth of  $m/z$  130 or  $m/z$  116 (F) and thus is also not relevant to the *o*-CH<sub>3</sub>C<sub>6</sub>H<sub>4</sub> + C<sub>3</sub>H<sub>4</sub> reactions.

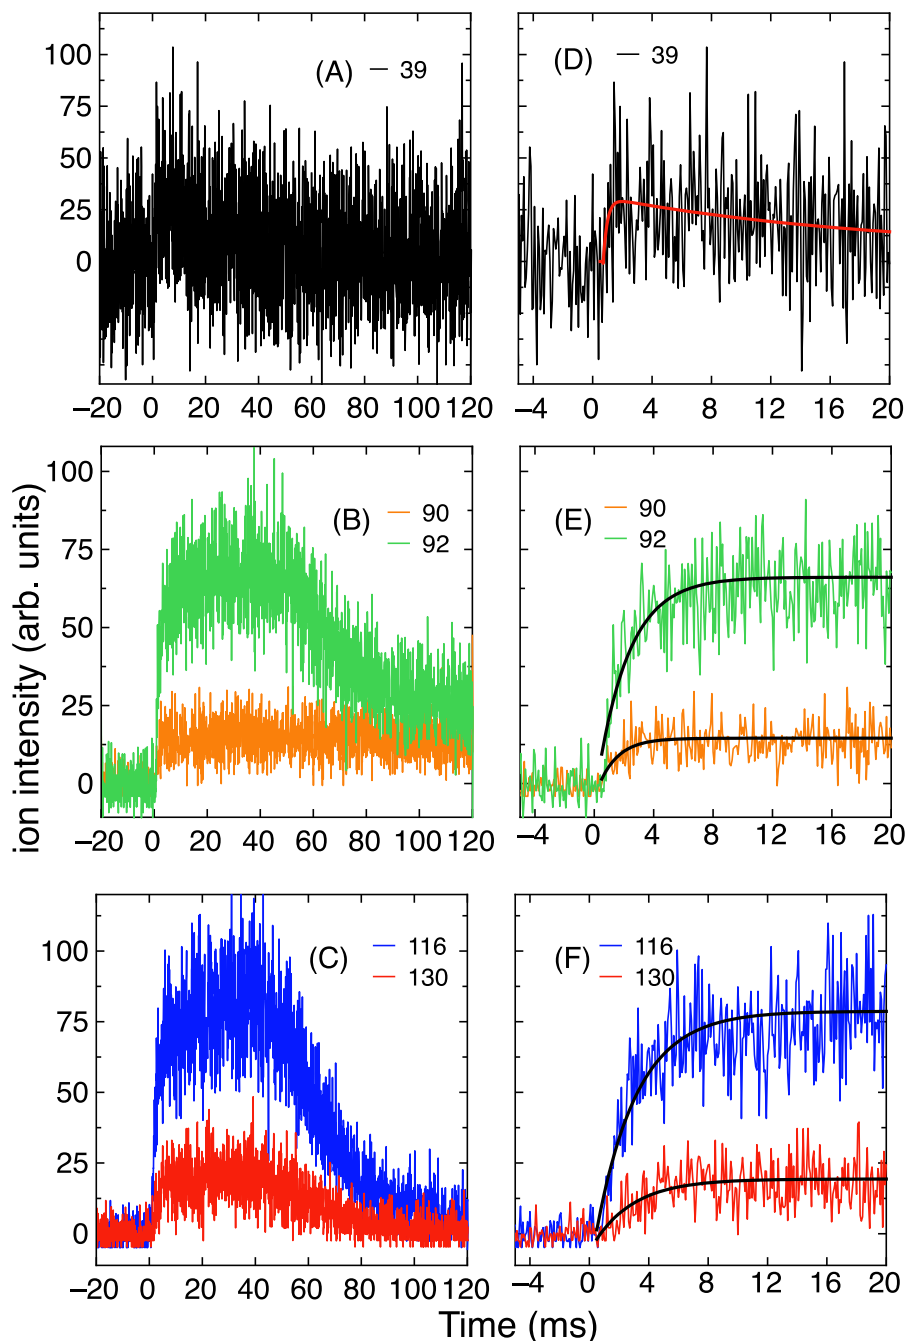

Figure S4. Kinetic traces of (A)  $m/z$  39, (B)  $m/z$  90 and 92, and (C)  $m/z$  130 and 116 from *o*-CH<sub>3</sub>C<sub>6</sub>H<sub>4</sub> + propyne at 600K. For all spectra, a second plot showing the profile between -5 and 10 ms is also provided (D, E and F). The time constants for each of these profiles is summarized in Table S1. (A)  $m/z$  39 follows a laser dependent trace (fast reaction time) and thus is not related to the targeted *o*-CH<sub>3</sub>C<sub>6</sub>H<sub>4</sub> + C<sub>3</sub>H<sub>4</sub> reaction. Following photolysis, the molecules furthest from the pinhole require ca. 60 ms reach the pinhole so after this time, the drop in signal represents pump out of the reactive molecules.

$$y = A_1 - A_2 e^{-(x-A_3) \times A_4}$$

Equation S1.

Equation S2.

$$y = A_1 - A_2 e^{-(x-A_3) \times A_4} + A_5 e^{-(x-A_3) \times A_6}$$

Table S1. Appearance coefficients for the kinetic traces shown in Figures S3 and S4.  $\pm 1$  std. dev. Traces with a single component were fitted using Equation S1, while traces with a growth and a decay component were fitted using Equation S2.

| <i>m/z</i> value | Allene Reaction (s <sup>-1</sup> ) | Propyne Reaction (s <sup>-1</sup> ) |
|------------------|------------------------------------|-------------------------------------|
| 39 (growth)      | 3500 $\pm$ 900                     | 3600 $\pm$ 400                      |
| 39 (decay)       | 55 $\pm$ 9                         | 50 $\pm$ 30                         |
| 41 (growth)      | 3400 $\pm$ 500                     | -                                   |
| 41 (decay)       | 27 $\pm$ 1                         | -                                   |
| 78               | 90 $\pm$ 40                        | -                                   |
| 90               | 900 $\pm$ 200                      | 800 $\pm$ 200                       |
| 92               | 790 $\pm$ 70                       | 690 $\pm$ 50                        |
| 116              | 500 $\pm$ 100                      | 360 $\pm$ 30                        |
| 130              | 490 $\pm$ 60                       | 400 $\pm$ 60                        |

Table S2. Calculated CBS-QB3 adiabatic ionization energies (AIEs) for C<sub>9</sub>H<sub>8</sub> isomers (116 Da). Relative CBS-QB3 enthalpies ( $\Delta H_f$ ) are provided. The techniques used to obtain literature values are indicated within brackets with EI meaning electron impact techniques, and PI meaning photoionisation mass spectrometry.

| C <sub>9</sub> H <sub>8</sub> isomer | Calculated AIE (eV) | Literature IE (eV)                 | Relative $\Delta H_f$ (kcal mol <sup>-1</sup> ) |
|--------------------------------------|---------------------|------------------------------------|-------------------------------------------------|
| indene                               | 8.2                 | 8.15 $\pm$ 0.015 (PE) <sup>1</sup> | 0.0                                             |
| 2-methylphenylacetylene              | 8.7                 | 8.61 $\pm$ 0.02 (PE) <sup>2</sup>  | 28.6                                            |
| propadienyl-benzene                  | 8.3                 | 8.29 <sup>3</sup>                  | 29.6                                            |
| propynyl-benzene                     | 8.4                 | 8.42 $\pm$ 0.08 (PE) <sup>4</sup>  | 27.0                                            |
| 3-phenyl-propyne                     | 9.0                 |                                    | 34.5                                            |

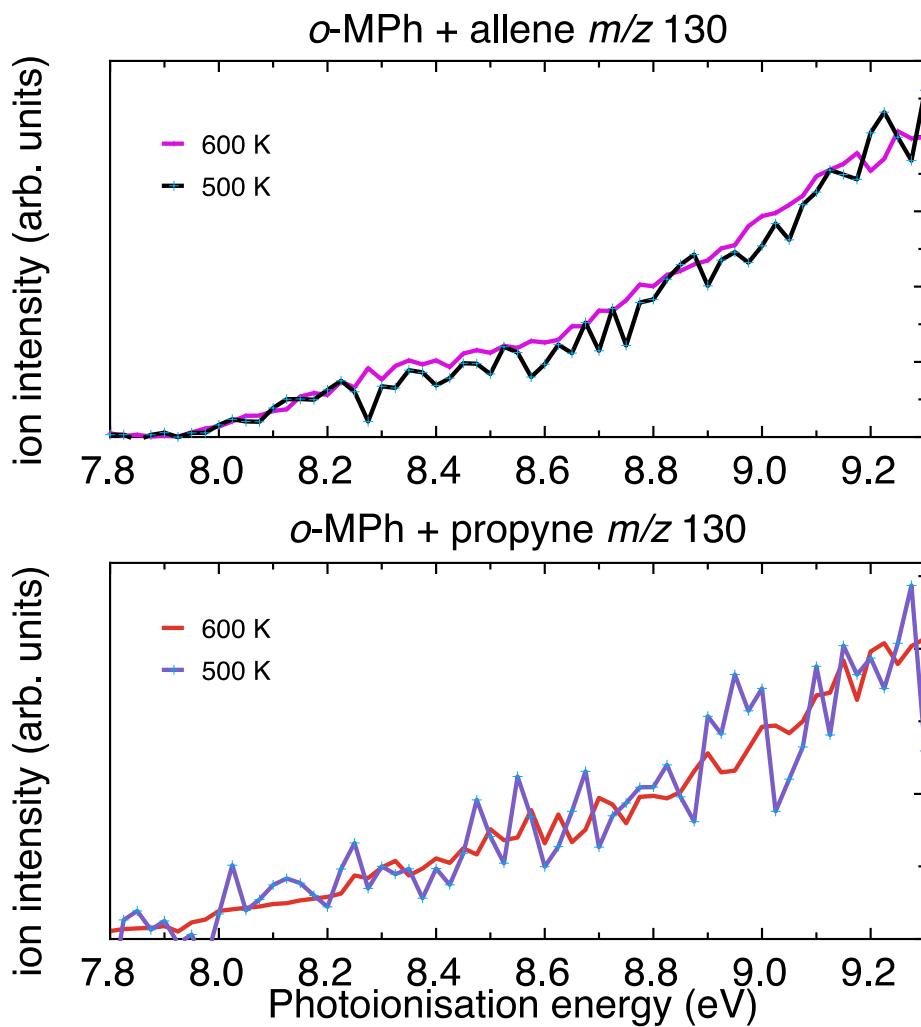

Figure S5. PI spectrum following *m/z* 130 for both reactions at 500 K and 600 K. The good comparison between these plots indicates the same products are made in both reactions.

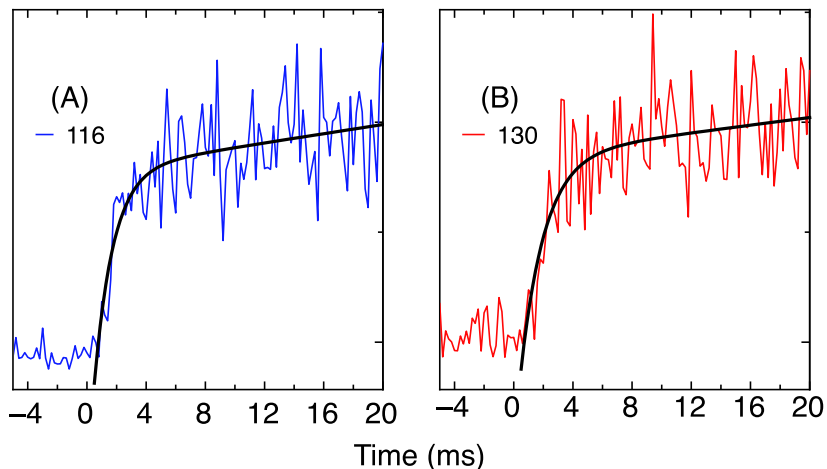

Figure S6. Kinetic traces of (a)  $m/z$  116 from  $o$ -CH<sub>3</sub>C<sub>6</sub>H<sub>4</sub> + allene and (b)  $m/z$  130 from  $o$ -CH<sub>3</sub>C<sub>6</sub>H<sub>4</sub> + propyne at 500K. The time constants for these profiles are  $800 \pm 300$  s<sup>-1</sup> for  $m/z$  116 and  $600 \pm 300$  s<sup>-1</sup> for  $m/z$  130. These values are within the uncertainty of the rate constants determined at 600 K, however, these values at 500 K have significantly larger uncertainty due to the decrease in S/N at this temperature.

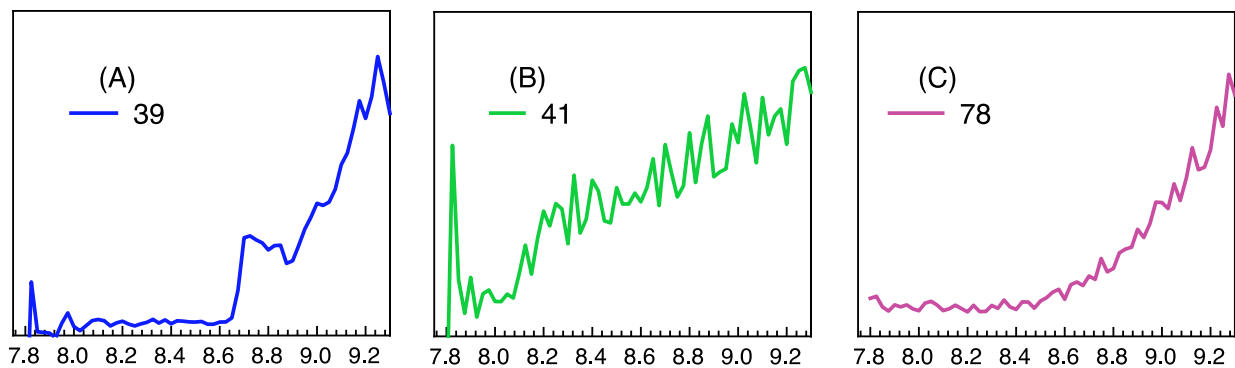

Figure S7. Representative PI spectra for (A)  $m/z$  39, (B)  $m/z$  41 and (C)  $m/z$  78 for the  $o$ -CH<sub>3</sub>C<sub>6</sub>H<sub>4</sub> + allene reaction at 600 K – these are not attributed to the title reactions, as discussed in the main text.

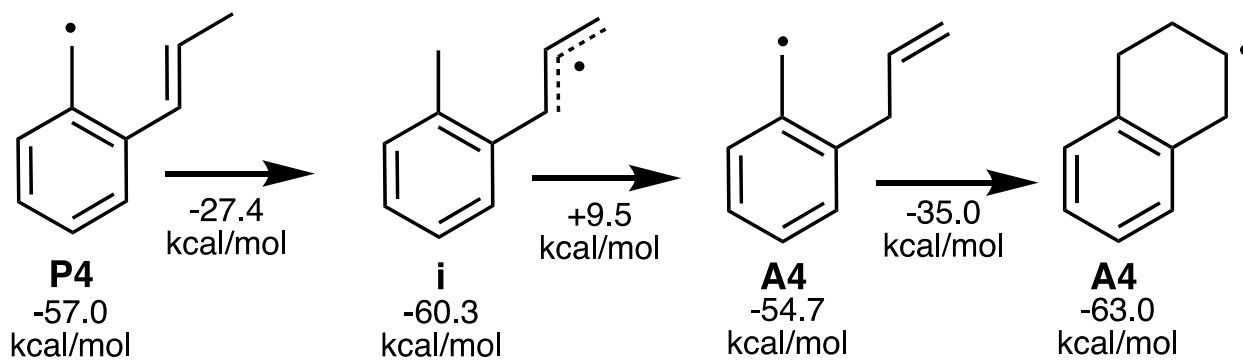

Figure S8. Reaction scheme following the isomerism of **P4** into **A4**. This mechanism is the only pathway to form a new six-membered ring for the propyne reaction. However, the rate limiting step for this pathway lies  $+9.5$  kcal/mol above the energy of the separated reactants and thus this mechanism is uncompetitive.



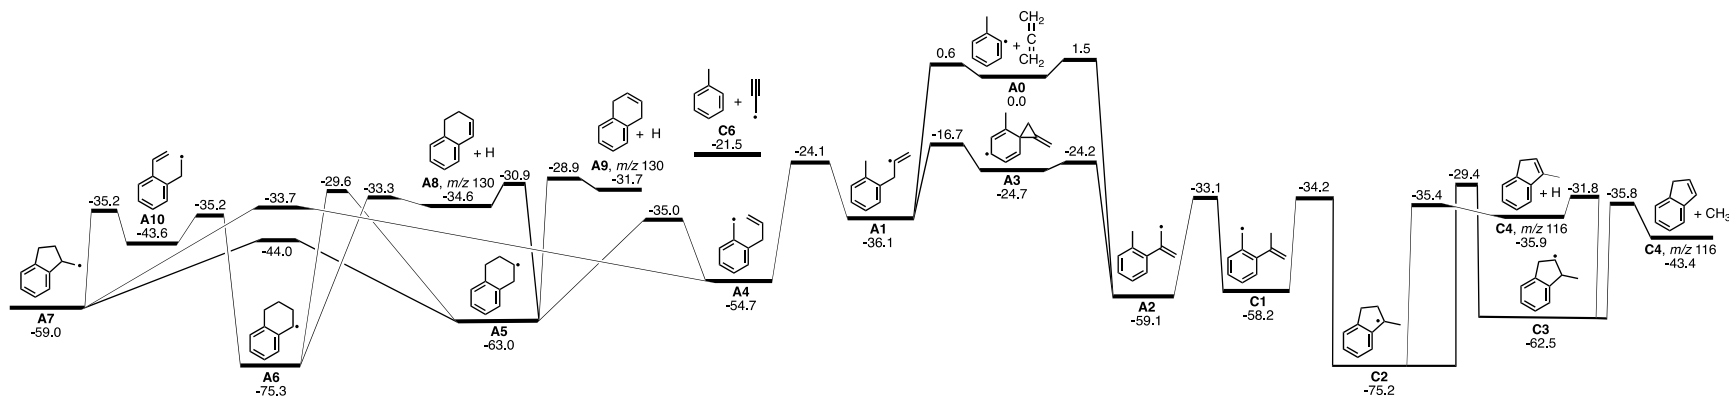

## 2. Supplementary Information for Quantum Chemical Calculations

Figure S9. Potential energy surface for all stationary points modelled for the *o*-CH<sub>3</sub>C<sub>6</sub>H<sub>4</sub> + allene reaction RRKM-ME simulation.

Figure S10. Potential energy surface for all stationary points modelled for the *o*-CH<sub>3</sub>C<sub>6</sub>H<sub>4</sub> + propyne reaction RRKM-ME simulation.

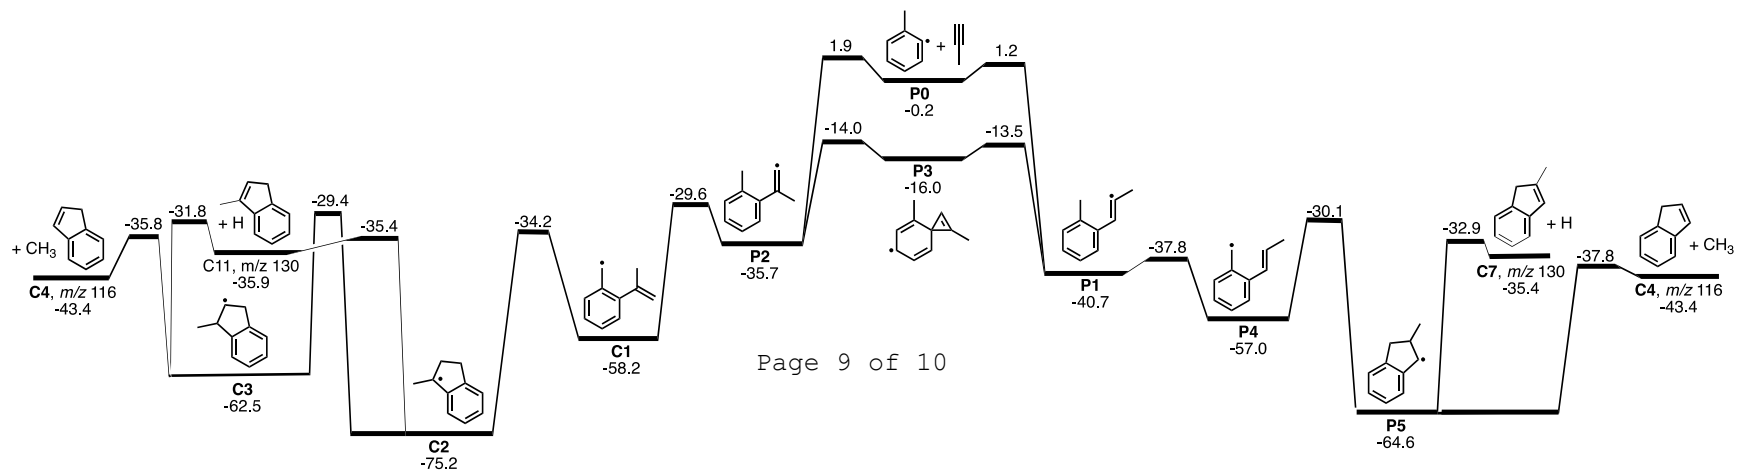

### 3. References

1. Güsten, H.; Klasinc, L.; Ruščić, B., Photoelectron Spectroscopy of Heterocycles. Indene Analogs. In *Z. Naturforsch. A*, 1976; Vol. 31, pp 1051-1056.
2. Carlier, P.; Mouvier, G., *J. Electron. Spectrosc. Relat. Phenom.* **1979**, *16* (2), 169-181.
3. Runge, W.; Kosbahn, W.; Kroner, J., *Ber. Bunsen-Ges. Phys. Chem.* **1975**, *79* (4), 371-381.
4. Lias, S. G.; Levin, R. D.; Kafafi, S. A., Ion Energetics Data. In *NIST Chemistry WebBook*, *NIST Standard Reference Database Number 69*, Linstrom, P. J.; Mallard, W. G., Eds. National Institute of Standards and Technology: Gaithersburg MD, 20899, 2011.
